# Supplementary material
Source: ML conference proceedings conference paper supplement (https://proceedings.mlr.press/v54/kallus17a.html)
Supplement: Supplementary file 1 [file kallus17a-supp.pdf]

## Supplementary Material

### Proofs

*Proof of Theorem 1.* Let us write SATT as

$$\text{SATT} = \frac{1}{n_1} \sum_{i \in \mathcal{T}_1} Y_i - \frac{1}{n_1} \sum_{i \in \mathcal{T}_1} Y_i(0).$$

It is then clear that SATT differs from  $\hat{\tau}_W$  only in the second term, that is,

$$\begin{aligned} \hat{\tau} - \text{SATT} &= \frac{1}{n_1} \sum_{i \in \mathcal{T}_1} Y_i(0) - \sum_{i \in \mathcal{T}_0} W_i Y_i(0) \\ &= \sum_{i=1}^n (-1)^{T_i+1} W_i Y_i(0) \\ &= \sum_{i=1}^n (-1)^{T_i+1} W_i f_0(X_i) + \sum_{i=1}^n (-1)^{T_i+1} W_i \epsilon_i, \end{aligned}$$

where we recognize the last term as  $E_W$ . For each term of  $E_W$  we have

$$\begin{aligned} \mathbb{E}[(-1)^{T_i+1} W_i \epsilon_i | X, T] \\ &= (-1)^{T_i+1} W_i (\mathbb{E}[Y_i(0) | X, T] - f_0(X_i)) \\ &= (-1)^{T_i+1} W_i (\mathbb{E}[Y_i(0) | X] - f_0(X_i)) = 0, \end{aligned}$$

where the first equality is by definition of  $\epsilon_i$  and the fact that  $W_i = W_i(X, T)$  and the second is by Assumption 1.  $\square$

*Proof of Theorem 2.* Let  $D$  be the distance matrix  $D_{ii'} = \delta(X_i, X_{i'})$ . For this choice of  $(\mathcal{F}, \|\cdot\|)$ , by linear optimization duality we get

$$\begin{aligned} \mathfrak{E}(W; \mathcal{F}) &= \frac{1}{n_1} \sup_{v_i - v_{i'} \leq D_{ii'} \forall i, i'} (\sum_{i \in \mathcal{T}_1} v_i - \sum_{i \in \mathcal{T}_0} n_1 W_i v_i) \\ &= \frac{1}{n_1} \min_S \sum_{i, i'} D_{ii'} S_{ii'} \\ &\quad \text{s.t. } S \in \mathbb{R}_+^{n \times n} \\ &\quad \sum_{i'=1}^n (S_{ii'} - S_{i'i}) = 1 \quad \forall i \in \mathcal{T}_1 \\ &\quad \sum_{i'=1}^n (S_{ii'} - S_{i'i}) = -n_1 W_i \quad \forall i \in \mathcal{T}_0. \end{aligned}$$

This describes a min-cost network flow problem with sources  $\mathcal{T}_1$  with inputs 1, sinks  $\mathcal{T}_0$  with outputs  $W_i$ , edges between every two nodes with costs  $D_{ii'}$  and without capacities. Consider any source  $i \in \mathcal{T}_1$  and any sink  $i' \in \mathcal{T}_0$  and any path  $i, i_1, \dots, i_m, i'$ . By the triangle inequality,  $D_{ii'} \leq D_{ii_1} + D_{i_1 i_2} + \dots + D_{i_m i'}$ . Therefore, as there are no capacities, it is always preferable to send the flow from the sources to the sinks along the direct edges from  $\mathcal{T}_1$  to  $\mathcal{T}_0$ . That is, we can eliminate all other edges and write

$$\begin{aligned} \mathfrak{E}(W; \mathcal{F}) &= \frac{1}{n_1} \min_S \sum_{i \in \mathcal{T}_1, i' \in \mathcal{T}_0} D_{ii'} S_{ii'} \\ &\quad \text{s.t. } S \in \mathbb{R}_+^{\mathcal{T}_1 \times \mathcal{T}_0} \\ &\quad \sum_{i' \in \mathcal{T}_0} S_{ii'} = 1 \quad \forall i \in \mathcal{T}_1 \\ &\quad \sum_{i \in \mathcal{T}_1} S_{ii'} = n_1 W_i \quad \forall i' \in \mathcal{T}_0. \end{aligned}$$

In the case of with replacement and  $\mathcal{W}_0 = \mathcal{W}_0^{\text{probability}}$ ,

using the transformation  $W'_i = n_1 W_i$ , we get

$$\begin{aligned} \min_{W \in \mathcal{W}} \mathfrak{E}(W; \mathcal{F}) \\ &= \frac{1}{n_1} \min_{S, W'} \sum_{i \in \mathcal{T}_1, i' \in \mathcal{T}_0} D_{ii'} S_{ii'} \\ &\quad \text{s.t. } S \in \mathbb{R}_+^{\mathcal{T}_1 \times \mathcal{T}_0} \\ &\quad W'_i \in \mathbb{R}_+^{\mathcal{T}_0} \\ &\quad \sum_{i \in \mathcal{T}_0} W'_i = n_1 \\ &\quad \sum_{i' \in \mathcal{T}_0} S_{ii'} = 1 \quad \forall i \in \mathcal{T}_1 \\ &\quad \sum_{i \in \mathcal{T}_1} S_{ii'} - W'_i = 0 \quad \forall i' \in \mathcal{T}_0. \end{aligned}$$

This describes a min-cost network flow problem with sources  $\mathcal{T}_1$  with inputs 1; nodes  $\mathcal{T}_0$  with 0 exogenous flow; one sink with output  $n_1$ ; edges from each  $i \in \mathcal{T}_1$  to each  $i' \in \mathcal{T}_0$  with flow variable  $S_{ii'}$ , cost  $D_{ii'}$ , and without capacity; and edges from each  $i \in \mathcal{T}_0$  to the sink with flow variable  $W'_i$  and without cost or capacity. Because all data is integer, the optimal solution of  $W' = n_1 W$  is integer [1]. Hence, since  $\mathcal{W}_0^{n_1\text{-multisubset}} \subseteq \mathbb{Z}/n_1$ , the solution is the same when we restrict to  $\mathcal{W}_0 = \mathcal{W}_0^{n_1\text{-multisubset}}$ . This solution (in terms of  $W'$ ) is equal to sending the whole input 1 from each source in  $\mathcal{T}_1$  to the node in  $\mathcal{T}_0$  with smallest distance and from there routing this flow to the sink, which corresponds exactly to one-to-one matching with replacement.

In the case of no replacement and  $\mathcal{W}_0 = \mathcal{W}_0^{n_1^{-1}\text{-bounded}}$ , using the transformation  $W'_i = n_1 W_i$ , we get

$$\begin{aligned} \min_{W \in \mathcal{W}} \mathfrak{E}(W; \mathcal{F}) \\ &= \frac{1}{n_1} \min_{S, W'} \sum_{i \in \mathcal{T}_1, i' \in \mathcal{T}_0} D_{ii'} S_{ii'} \\ &\quad \text{s.t. } S \in \mathbb{R}_+^{\mathcal{T}_1 \times \mathcal{T}_0} \\ &\quad W'_i \in \mathbb{R}_+^{\mathcal{T}_0} \\ &\quad \sum_{i \in \mathcal{T}_0} W'_i = n_1 \\ &\quad W'_i \leq 1 \quad \forall i \in \mathcal{T}_0 \\ &\quad \sum_{i' \in \mathcal{T}_0} S_{ii'} = 1 \quad \forall i \in \mathcal{T}_1 \\ &\quad \sum_{i \in \mathcal{T}_1} S_{ii'} - W'_i = 0 \quad \forall i' \in \mathcal{T}_0. \end{aligned}$$

This describes the same min-cost network flow problem except that the edges from each  $i \in \mathcal{T}_0$  to the sink have a capacity of 1. Because all data is integer, the optimal solution of  $S$  and  $W' = n_1 W$  is integer [1]. Hence, since  $\mathcal{W}_0^{n_1\text{-subset}} \subseteq \mathbb{Z}/n_1$ , the solution is the same when we restrict to  $\mathcal{W}_0 = \mathcal{W}_0^{n_1\text{-subset}}$ . The optimal  $S_{ii'}$  is integer and so, by  $\sum_{i' \in \mathcal{T}_0} S_{ii'} = 1$ , for each  $i \in \mathcal{T}_1$  there is exactly one  $i' \in \mathcal{T}_0$  with  $S_{ii'} = 1$  and all others are zero.  $S_{ii'} = 1$  denotes matching  $i$  with  $i'$ . The optimal  $W'_i$  is integral and so, by  $W'_i \leq 1$ ,  $W'_i \in \{0, 1\}$ . Hence, for each  $i \in \mathcal{T}_0$ ,

$\sum_{i' \in \mathcal{T}_1} S_{ii'} \in \{0, 1\}$  so we only use node  $i$  at most once. The cost of  $S$  is exactly the sum of pairwise distances in the match. Hence, the optimal solution corresponds exactly to one-to-one matching without replacement.  $\square$

*Proof of Corollary 3.* Apply Theorem 2 with the metric

$$\delta'(x, x') = \mathbb{I}_{[x \neq x']} \max\{\delta(x, x'), \delta_0\}. \quad \square$$

*Proof of Theorem 4.* This choice of space leads to

$$\mathfrak{E}(W; \mathcal{F}) = \sum_{j=1}^M \left| \frac{1}{n_1} \sum_{i \in \mathcal{T}_1} \mathbb{I}_{[C(X_i)=j]} - \sum_{i \in \mathcal{T}_0} W_i \mathbb{I}_{[C(X_i)=j]} \right|.$$

That is, the worst-case  $f$  assigns  $\pm 1$  to each partition in order to make the difference of values in that partition be nonnegative. Then clearly the optimal choice of  $W \in \mathbb{R}^{\mathcal{T}_0}$  is to make each of these absolute values equal zero. This happens exactly when, for each  $i \in \mathcal{T}_0$ ,

$$\begin{aligned} W_i &= \frac{1}{n_1} \frac{|i' \in \mathcal{T}_1: C(X_{i'})=C(X_i)|}{|i' \in \mathcal{T}_0: C(X_{i'})=C(X_i)|} \\ &= \frac{1}{n_1} \frac{\text{num treatment subjects in same partition as } i}{\text{num control subjects in same partition as } i}, \end{aligned}$$

where  $0/0 = 0$  and we never encounter dividing a positive integer by 0 due to the no-extrapolation assumption. Because the weight is nonnegative, the solution is unchanged when restricting to nonnegative weights.  $\square$

*Proof of Theorem 5.* By duality of norms,

$$\begin{aligned} \mathfrak{E}(W; \mathcal{F}) &= \sup_{\beta^T V \beta \leq 1} \beta^T \left( \frac{1}{n_1} \sum_{i \in \mathcal{T}_1} X_i - \sum_{i \in \mathcal{T}_0} W_i X_i \right) \\ &= M_V(W). \end{aligned}$$

The optimal  $W$  minimizes this discrepancy over subsamples from control with the allowable size.  $\square$

*Proof of Theorem 6.* We have

$$\begin{aligned} \mathfrak{E}^2(W; \mathcal{F}) &= \max_{\|f\| \leq 1} \left( \sum_{i=1}^n (-1)^{T_i+1} W_i f(X_i) \right)^2 \\ &= \left\langle \sum_{i=1}^n (-1)^{T_i+1} W_i \mathcal{K}(X_i, \cdot), \sum_{i=1}^n (-1)^{T_i+1} W_i \mathcal{K}(X_i, \cdot) \right\rangle \\ &= \sum_{i,j=1}^n (-1)^{T_i+T_j} W_i W_j K_{ij}, \end{aligned}$$

which when written in block form gives rise to the result.  $\square$

*Proof of Theorem 7.* First we show  $\mathfrak{E}_{\min}(\mathcal{F}) \rightarrow 0$  a.s. by showing that we can construct a feasible  $\tilde{W}$  such that  $\mathfrak{E}(\tilde{W}; \mathcal{F}) \rightarrow 0$  a.s. Let  $p(x) = \mathbb{P}(T=1|X=x)$ . By Assumption 1,  $0 < p(X) < 1$  a.s. So there exists  $\alpha > 0$  such that  $q(x) = \alpha p(x)/(1-p(x))$  is a.s. in  $(0, 1)$ . For each  $i$ , let  $\tilde{W}'_i \in \{0, 1\}$  be Bernoulli with probability  $q(X_i)$ . Then we have that  $X_i|T=0, \tilde{W}'_i=1$  is distributed as  $X_i|T=1$ . Let  $n'_0 = \sum_{j \in \mathcal{T}_0} \tilde{W}'_j$  and

note that  $n'_0 \geq n'_0$  eventually a.s. For each  $i \in \mathcal{T}_0$ , set  $\tilde{W}_i = \tilde{W}'_i/n'_0$ . Let  $\zeta(f) = \mathbb{E}[f(X_1) | T=1]$ ,  $\xi_i(f) = (T_i + \tilde{W}'_i)(f(X_i) - \zeta(f))$ . Let  $A_0 = \frac{1}{n_0} \sum_{i \in \mathcal{T}_0} \xi_i$  and  $A_1 = \frac{1}{n_1} \sum_{i \in \mathcal{T}_1} \xi_i$ . Adding and subtracting  $\zeta$ , we see  $\mathcal{E}(\tilde{W}; f) = A_1(f) - (n_0/n'_0)A_0(f)$ . By construction of  $\tilde{W}'_i$ , we see that  $\mathbb{E}[\xi_i] = 0$  (i.e., Bochner integral). By (5),  $\|\xi\|_*$  has (a) second or (b) first moment. By (1), each  $\xi_i$  is independent. Therefore, by [2] for (5)(a) (since  $B$ -convexity of  $\mathcal{F}$  implies  $B$ -convexity of  $\mathcal{F}^*$ ; see [20]) or by [6] for (5)(b), a law of large numbers holds yielding, a.s.,  $\|A_0\|_* \rightarrow 0$  and  $\|A_1\|_* \rightarrow 0$ . Since  $(n_0/n'_0) \rightarrow \alpha \mathbb{E}[p(X_1)] < \infty$  a.s., we have that  $\|\mathcal{E}(\tilde{W}; \cdot)\|_* \rightarrow 0$  a.s. By (3)  $\tilde{W}$  is feasible, so, a.s.

$$\mathfrak{E}_{\min}(\mathcal{F}) = \mathfrak{E}(W; \mathcal{F}) \leq \mathfrak{E}(\tilde{W}; \mathcal{F}) = \|\mathcal{E}(\tilde{W}; \cdot)\|_* \rightarrow 0.$$

Fix  $\epsilon > 0$ . By (4), there is a  $g_0 \in \mathcal{F}$  such that  $\sup_x |f_0(x) - g_0(x)| \leq \epsilon/2$ . Hence,

$$\begin{aligned} |\mathcal{E}(W; f_0)| &\leq |\mathcal{E}(W; g_0)| + 2 \sup_{i=1, \dots, n} |f_0(X_i) - g_0(X_i)| \\ &\leq \|g_0\| \mathfrak{E}(W; \mathcal{F}) + \epsilon = \|g_0\| \mathfrak{E}_{\min} + \epsilon \rightarrow \epsilon. \end{aligned}$$

Since true for any  $\epsilon > 0$ ,  $|\mathcal{E}(W; f_0)| \rightarrow 0$  a.s.  $\square$
